# Supplementary material
Source: PubMed Central journal article supplement (PMC3387880)
Supplement: supp_peds.2010-3681_zpe609117576p.pdf [file supp_peds.2010-3681_zpe609117576p.pdf]

## Supplemental Information

**SUPPLEMENTAL TABLE 4** ICD-9 and CPT Codes Used in the Study

| Diagnosis or Procedure                                                                               | ICD-9 and CPT Code(s)                                                                                                                                                                       |
|------------------------------------------------------------------------------------------------------|---------------------------------------------------------------------------------------------------------------------------------------------------------------------------------------------|
| Carbuncle or furuncle                                                                                | 680.xx                                                                                                                                                                                      |
| Cellulitis or abscess of finger/toe                                                                  | 681.00-01, 681.9                                                                                                                                                                            |
| Other cellulitis or abscess                                                                          | 682.xx                                                                                                                                                                                      |
| Impetigo                                                                                             | 684                                                                                                                                                                                         |
| Unspecified local infection of skin or subcutaneous tissue                                           | 686.8-9                                                                                                                                                                                     |
| Superficial injury with mention of infection                                                         | 910.1, 910.3, 910.9, 911.1, 911.3, 911.9, 912.1, 912.3, 912.9, 913.1, 913.3, 913.9, 914.1, 914.3, 914.9, 915.1, 915.3, 915.9, 916.1, 916.3, 916.9, 917.1, 917.3, 917.9, 919.1, 919.3, 919.9 |
| Dermatitis infectiosa eczematoides                                                                   | 690.8                                                                                                                                                                                       |
| Folliculitis                                                                                         | 704.8                                                                                                                                                                                       |
| Erysipelas                                                                                           | 035                                                                                                                                                                                         |
| Incision and drainage                                                                                | (ICD-9 procedure) 86.01, 86.04, 49.01 (CPT) 10060, 10061, 10160                                                                                                                             |
| Exclusions                                                                                           |                                                                                                                                                                                             |
| Open wounds, postoperative wounds, wound infections, burns                                           | 674.3x, 940.xx-947.xx, 949.0-949.5, 958.3, 998.3x, 998.5x, 998.83, 998.9                                                                                                                    |
| Incision and drainage (post-operative wound, foreign body removal, dental procedure, pilonidal cyst) | (ICD-9 procedure) 27.0, 27.92, 54.0, 54.19, 54.91, 86.03, 86.05 (CPT) 10120, 10121, 10180                                                                                                   |

**SUPPLEMENTAL TABLE 5** Children Experiencing at Least 1 Recurrence by 1, 3, 6, 9, and 12 Months of Follow-up, Stratified According to Drainage

|             | Antibiotic Treatment Group |                                        |                          |
|-------------|----------------------------|----------------------------------------|--------------------------|
|             | Clindamycin, No. (%)       | Trimethoprim-Sulfamethoxazole, No. (%) | $\beta$ -Lactam, No. (%) |
| No drainage |                            |                                        |                          |
| 1 mo        | 67 (1.4)                   | 178 (2.4)                              | 638 (2.6)                |
| 3 mo        | 257 (5.3)                  | 638 (8.2)                              | 1,854 (7.2)              |
| 6 mo        | 403 (8.1)                  | 950 (11.7)                             | 2,604 (9.8)              |
| 9 mo        | 527 (10.3)                 | 1134 (13.7)                            | 3,099 (11.5)             |
| 12 mo       | 610 (11.8)                 | 1272 (15.1)                            | 3,554 (12.9)             |
| Drainage    |                            |                                        |                          |
| 1 mo        | 22 (1.1)                   | 52 (2.7)                               | 54 (3.3)                 |
| 3 mo        | 102 (4.9)                  | 191 (9.4)                              | 177 (10.1)               |
| 6 mo        | 180 (8.3)                  | 279 (13.1)                             | 260 (14.2)               |
| 9 mo        | 233 (10.5)                 | 324 (14.9)                             | 312 (16.5)               |
| 12 mo       | 280 (12.3)                 | 359 (16.3)                             | 355 (18.4)               |

Values displayed in the table represent the number (percentage) of incident SSTIs that resulted in at least 1 recurrence event by the end of the specified follow-up period. SSTIs were based on a visit with a specific ICD-9 code and a prescription fill for an antibiotic within 2 days. Recurrence was defined by fulfilling the same criteria (including a new antibiotic) between 15 and 365 days following the incident event. Drainage was based on CPT and ICD-9 procedure codes representing incision and drainage.

**SUPPLEMENTAL TABLE 6** Adjusted HRs (95% CI) for First Recurrence, Stratified According to Drainage, Overall and Excluding Children With a Treatment Failure

|                   | Antibiotic Treatment Group |                               |                  |
|-------------------|----------------------------|-------------------------------|------------------|
|                   | Clindamycin                | Trimethoprim-Sulfamethoxazole | $\beta$ -Lactam  |
| Drainage          |                            |                               |                  |
| Overall           | 1.00 (Ref)                 | 1.26 (1.06–1.49)              | 1.42 (1.19–1.69) |
| Failures excluded | 1.00 (Ref)                 | 1.23 (1.03–1.47)              | 1.39 (1.16–1.67) |
| No drainage       |                            |                               |                  |
| Overall           | 1.00 (Ref)                 | 1.24 (0.87–1.79)              | 0.99 (0.70–1.40) |
| Failures excluded | 1.00 (Ref)                 | 1.30 (1.18–1.44)              | 1.08 (0.99–1.18) |

SSTIs were based on a visit with a specific ICD-9 code and a prescription fill for an antibiotic within 2 days. Treatment failure and recurrence were defined by fulfilling the same criteria (including a new antibiotic) within 14 days and between 15 and 365 days, respectively, of the incident event. Drainage was based on CPT and ICD-9 procedure codes representing incision and drainage. HRs were estimated from Cox proportional hazards regression. Models adjusted for year, age, gender, race/ethnicity, and diagnosis.

**SUPPLEMENTAL TABLE 7** Adjusted ORs (95% CI) for Treatment Failure, Stratified According to Drainage and Gender

|             | Antibiotic Treatment Group |                               |                  |
|-------------|----------------------------|-------------------------------|------------------|
|             | Clindamycin                | Trimethoprim-Sulfamethoxazole | $\beta$ -Lactam  |
| Drainage    |                            |                               |                  |
| Male        | 1.00 (Ref)                 | 2.12 (1.46–3.06)              | 2.38 (1.62–3.49) |
| Female      | 1.00 (Ref)                 | 1.76 (1.25–2.48)              | 2.11 (1.46–3.04) |
| No drainage |                            |                               |                  |
| Male        | 1.00 (Ref)                 | 1.68 (1.34–2.09)              | 1.29 (1.04–1.58) |
| Female      | 1.00 (Ref)                 | 1.66 (1.35–2.05)              | 1.16 (0.95–1.42) |

**SUPPLEMENTAL TABLE 8** Adjusted HRs (95% CI) for First Recurrence, Stratified According to Drainage and Gender

|             | Antibiotic Treatment Group |                               |                  |
|-------------|----------------------------|-------------------------------|------------------|
|             | Clindamycin                | Trimethoprim-Sulfamethoxazole | $\beta$ -Lactam  |
| Drainage    |                            |                               |                  |
| Male        | 1.00 (Ref)                 | 1.39 (1.09–1.78)              | 1.32 (1.03–1.71) |
| Female      | 1.00 (Ref)                 | 1.14 (0.90–1.43)              | 1.52 (1.20–1.93) |
| No drainage |                            |                               |                  |
| Male        | 1.00 (Ref)                 | 1.27 (1.10–1.48)              | 1.09 (0.95–1.25) |
| Female      | 1.00 (Ref)                 | 1.32 (1.16–1.51)              | 1.07 (0.95–1.21) |

SSTIs were based on a visit with a specific ICD-9 code and a prescription fill for an antibiotic within 2 days. Treatment failure and recurrence were defined by fulfilling the same criteria (including a new antibiotic) within 14 days and between 15 and 365 days, respectively, of the incident event. Drainage was based on CPT and ICD-9 procedure codes representing incision and drainage. ORs were estimated from logistic regression. HRs were estimated from Cox proportional hazards regression. Models adjusted for year, age, gender, race/ethnicity, and diagnosis.

**SUPPLEMENTAL TABLE 9** Treatment Failure and Recurrence Risk Among Children Receiving a Drainage Procedure According to Antibiotic Treatment Group

|                                           | Antibiotic Treatment Group |                               |                  |                  |
|-------------------------------------------|----------------------------|-------------------------------|------------------|------------------|
|                                           | Clindamycin                | Trimethoprim-Sulfamethoxazole | $\beta$ -Lactam  | No Antibiotics   |
| Treatment Failure                         |                            |                               |                  |                  |
| No. of incident SSTIs                     | 2,270                      | 2,206                         | 1,931            | 2,611            |
| No. of treatment failures (%)             | 107 (4.7)                  | 246 (11.2)                    | 215 (11.1)       | 387 (14.8)       |
| Unadjusted OR (95% CI)                    | 1.00 (Ref)                 | 2.54 (2.01–3.21)              | 2.53 (1.99–3.22) | 3.52 (2.82–4.40) |
| Adjusted OR (95% CI)                      | 1.00 (Ref)                 | 1.91 (1.50–2.45)              | 2.30 (1.78–2.95) | 3.25 (2.59–4.08) |
| Recurrence                                |                            |                               |                  |                  |
| No. of first recurrences (%) <sup>a</sup> | 280 (12.3)                 | 359 (16.3)                    | 355 (18.4)       | 360 (13.8)       |
| Person-years                              | 1619                       | 1329                          | 1415             | 1859             |
| Events per 1000 person-years              | 173.0                      | 270.1                         | 250.9            | 193.7            |
| Unadjusted HR (95% CI)                    | 1.00 (Ref)                 | 1.51 (1.29–1.77)              | 1.47 (1.26–1.72) | 1.12 (0.96–1.32) |
| Adjusted HR (95% CI)                      | 1.00 (Ref)                 | 1.23 (1.04–1.45)              | 1.36 (1.15–1.61) | 1.05 (0.89–1.23) |

SSTIs were based on a visit with a specific ICD-9 code (Supplemental Table 4) and a prescription fill for an antibiotic within 2 days. Treatment failure and recurrence were defined by fulfilling the same criteria (including a new antibiotic) within 14 days and between 14 and 365 days, respectively. Drainage was based on CPT and ICD-9 procedure codes (Supplemental Table 4) representing incision and drainage. ORs estimated from logistic regression. HRs estimated from Cox proportional hazards regression. Models adjusted for year, age, gender, race/ethnicity, and diagnosis.

<sup>a</sup> Percentages reflect the proportion of incident SSTIs in each antibiotic category that resulted in at least 1 recurrence event.
